# Supplementary material
Source: Elsevier journal article supplement (https://www.sciencedirect.com/science/article/pii/S0021755721000838)
Supplement: mmc1 [file S0021755721000838:mmc1.docx]

**JPED-D-21-00047 – Supplementary Material**

[**Supplementary Table 1**](https://docs.google.com/spreadsheets/d/184U7ghN-jaYgXkZ4CJBHiManh3he9_Ya8PqEKTKwKXQ/edit#gid=0) **- Comparison between included and not included (did not return to perform LFI test) patients.**

| **Variable** | **Included n = 175, n (%)** | **Not included n = 179, n (%)** | **p-value** |
| --- | --- | --- | --- |
| Age, median (IQR) | 7.4 (2.9-11.7) | 4.9 (2.2-8.9) | **0.004a** |
| Male sex | 81 (46.29) | 85 (47.49) | 0.905b |
| **Racial or ethnic group** |  |  |  |
| Caucasian | 115 (65.71) | 136 (75.98) | **0.048**b |
| Mixed/mulatto | 29 (16.57) | 19 (10.61) |  |
| Black | 25 (14.29) | 14 (7.82) |  |
| Other/not reported | 6 (3.43) | 10 (5.59) |  |
| **Co-morbid conditions** |  |  |  |
| Asthma | 27 (15.43) | 33 (18.44) | 0.602b |
| Obesity | 2 (1.14) | 1 (0.56) | 1.000c |
| Diabetes mellitus, type 1 or 2 | 1 (0.40) | 0 (0.00) | 0.494c |
| **RT-PCR result** |  |  |  |
| Positive | 51 (29.14) | 36 (20.11) | 0.064b |
| Negative | 124 (70.86) | 143 (79.89) |  |

a Mann-Whitney-Wilcoxon test.

b Pearson's Chi-squared test.

c Fisher's Exact test
